# Supplementary material
Source: Springer Nature journal article supplement (https://www.springermedizin.de/resource/supplementary/12943_2013_1281_MOESM9_ESM.pdf/9553160)

**PFS****OS****A**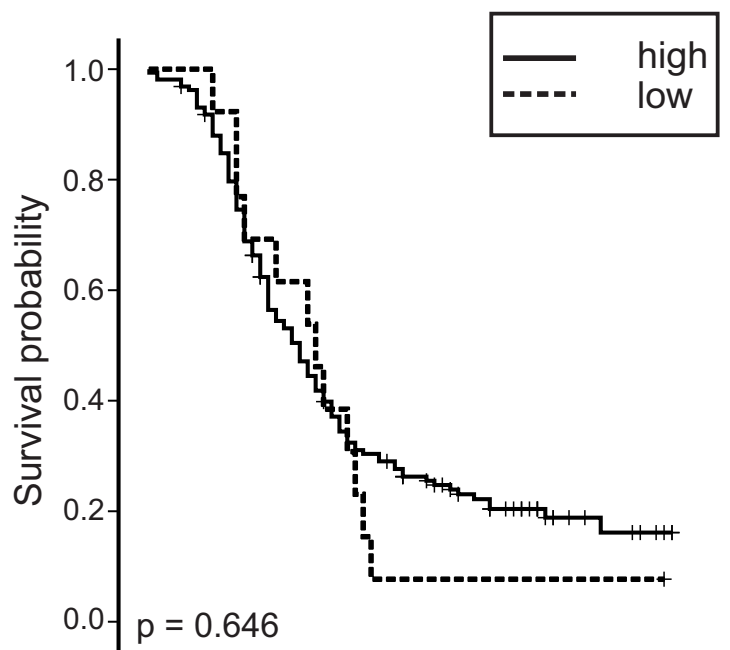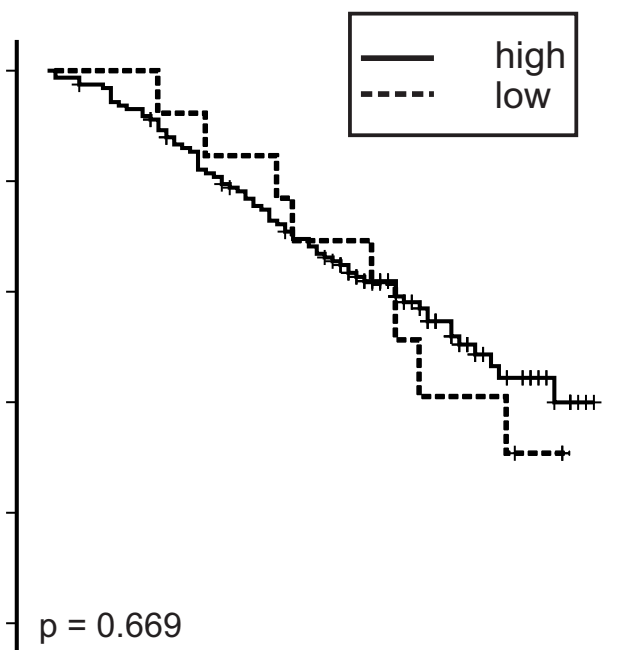**B**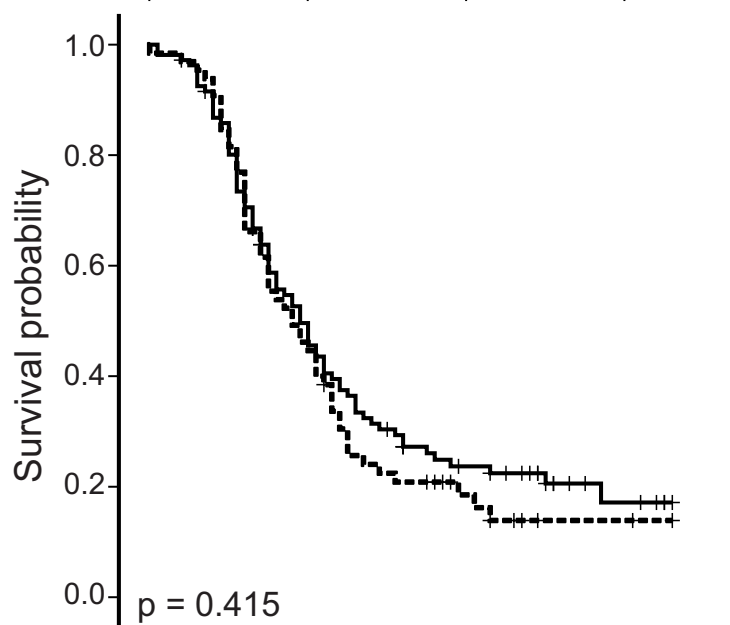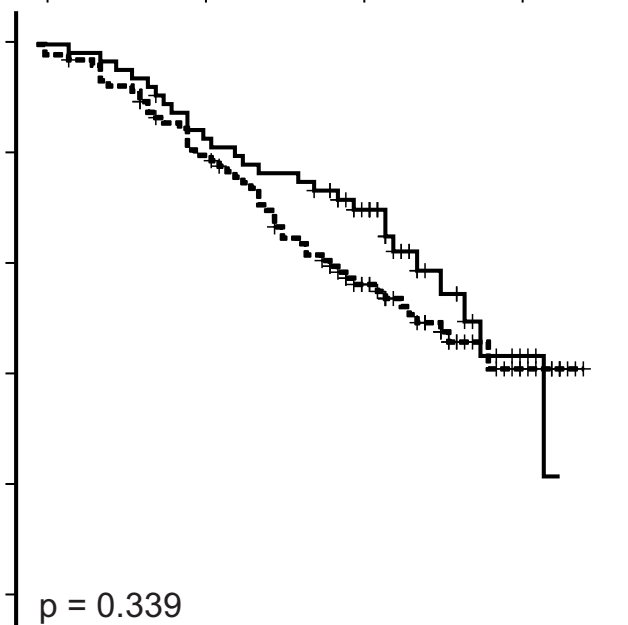**C**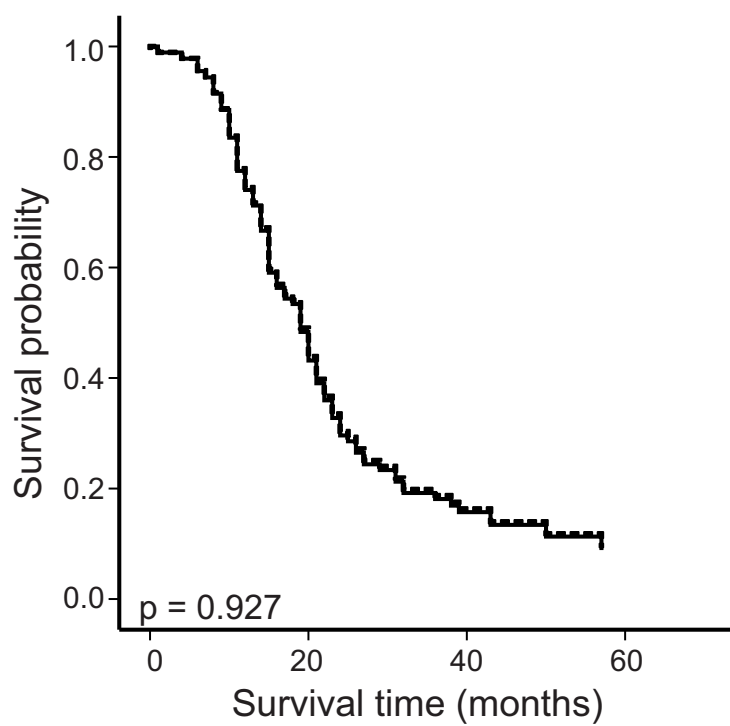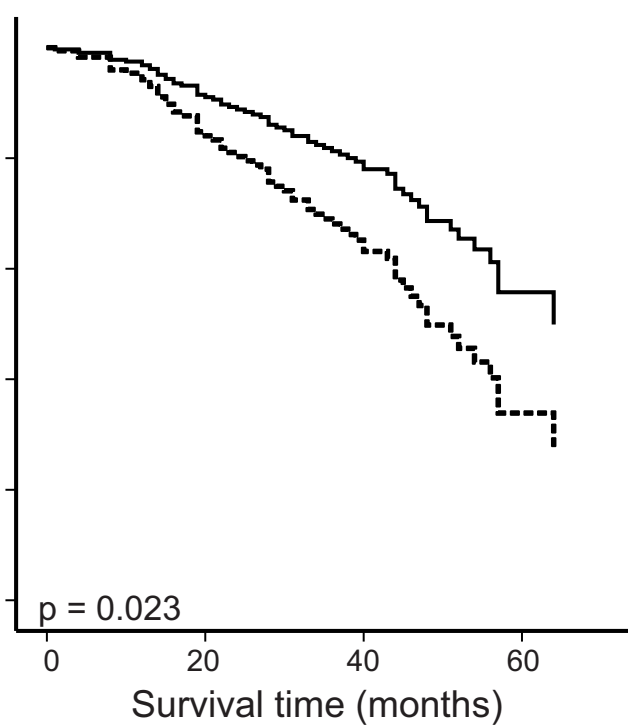

Supplement: MOESM9 [file 9553160]
